# Supplementary material for: Synthesis and growth mechanism of monodispersed MoS2 sheets/carbon microspheres
Source: Royal Society of Chemistry journal article supplement (doi:10.1039/c2ce06543f), 2012-01-01
Supplement: c2ce06543f.pdf [file c2ce06543f.pdf]

## Electronic Supplementary Information

### Synthesis and Growth Mechanism of Monodispersed MoS<sub>2</sub> Sheets/Carbon Microspheres

Haijun Tao<sup>1,2</sup>, Kazumichi Yanagisawa<sup>2,\*</sup>, Chuanxiang Zhang<sup>2</sup>, Tadaharu Ueda<sup>3</sup>,  
Ayumu Onda<sup>2</sup>, Nan Li<sup>4</sup>, Tatsuo Shou<sup>5</sup>, Sumio Kamiya<sup>5</sup>, Jie Tao<sup>1</sup>

<sup>1</sup>College of Material Science and Technology, Nanjing University of Aeronautics and  
Astronautics, Nanjing 210016, P. R. China

<sup>2</sup>Research Laboratory for Hydrothermal Chemistry, Kochi University, Kochi  
780-8073, Japan

<sup>3</sup>Department of Chemistry, Faculty of Science, Kochi University, Kochi 780-8520,  
Japan <sup>4</sup>College of Material Science and Engineering, Key laboratory of Automobile  
Material of Ministry of Education, Jilin University, Changchun 130012, P. R. China

<sup>5</sup>Power Train Material Engineering Div., Toyota Motor Corporation, Toyota  
471-8572, Japan

\* To whom all correspondence should be addressed. E-mail: [yanagi@kochi-u.ac.jp](mailto:yanagi@kochi-u.ac.jp),

Tel: +81-88-844-8352, Fax: +81-88-844-8362.

### XPS data report:

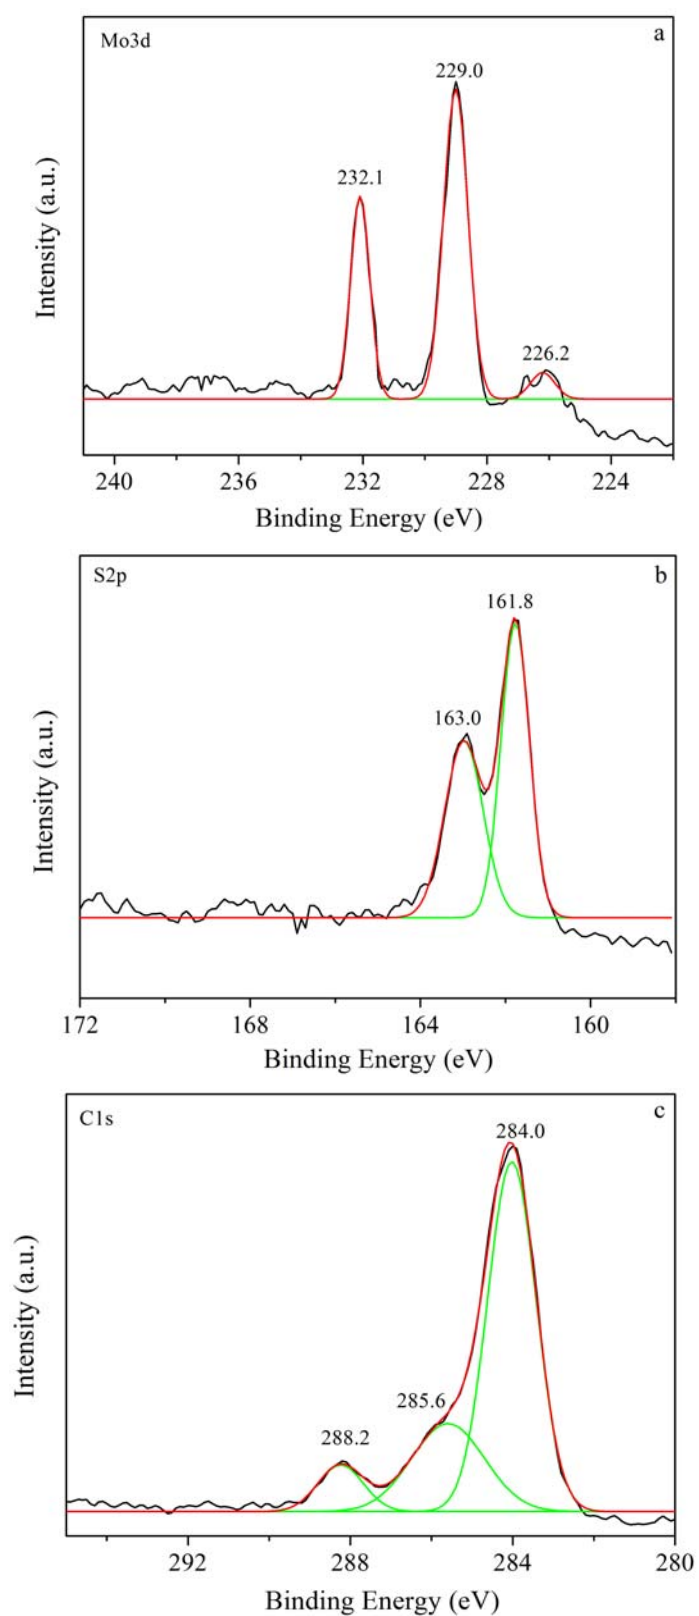

**Fig. S1.** XPS studies of the as-prepared sample at 400 °C: (a) high-resolution spectra for Mo 3d, (b) high-resolution spectra for S 2p, (c) high-resolution spectra for C 1s, before and after curve peak fitting.

XPS analysis has been carried out to identify the components and structures of the as-prepared sample at 400 °C. The Mo 3d, S 2p and C 1s XPS spectra for the as-prepared sample at 400 °C are presented in Fig. S1. The high resolution deconvoluted spectra in the region of binding energy for Mo 3d (displayed in Fig. S1a) shows three peaks positioned at 232.1, 229.0, and 226.2 eV corresponding to Mo and S species present in the sample. The first two peaks centered at 232.1 and 229.0 eV can be contributed by 3d doublet (i.e. 3d<sub>3/2</sub> and 3d<sub>5/2</sub> respectively) of the Mo(IV) species in MoS<sub>2</sub>. The third peak at 226.2 eV can be ascribed to the 2s binding energy of S in MoS<sub>2</sub>. The S 2p photoelectron peak of the sample in Fig. S1b depicts two distinct peaks after deconvolution. These peaks, which are centered at 163.0 and 161.8 eV, and represent the respective binding energies for 2p<sub>1/2</sub> and 2p<sub>3/2</sub> of S<sup>2-</sup>, are consistent with those in MoS<sub>2</sub> <sup>[1-2]</sup>. Similarly, the C 1s photoelectron peak shown in Fig. S1c can be decomposed in three symmetrical peaks situated at 288.2, 285.6, and 284.0 eV. They are due to COOR, C-CO (or C-S) and C-C (or C<sub>2</sub>H<sub>2</sub>), respectively <sup>[3-4]</sup>. Compared with the XRD and Raman data, we deem that the product was consisted by MoS<sub>2</sub>, carbon, and some organic functional groups exist in the carbon.

## References:

- [1] P. K. Panigrahi, A. Pathak, Materials Research Bulletin, 46 (2011) 2240-2246.
- [2] K. C. Wong, X. Lu, J. Cotter, D. T. Eadie, P. C. Wong, K. A. R. Mitchell, Wear, 264 (2008) 526-534.
- [3] I. Crassous, H. Groult, F. Lantelme, D. Devilliers, A. Tressaud, C. Labrugère, M. Dubois, C. Belhomme, A. Colisson, B. Morel, Journal of Fluorine Chemistry, 130 (2009) 1080-1085.
- [4] N. Freyer, G. Pirug, H. P. Bonzel, Surface Science, 125 (1983) 327-334.

**TEM images and XRD spectrum:**

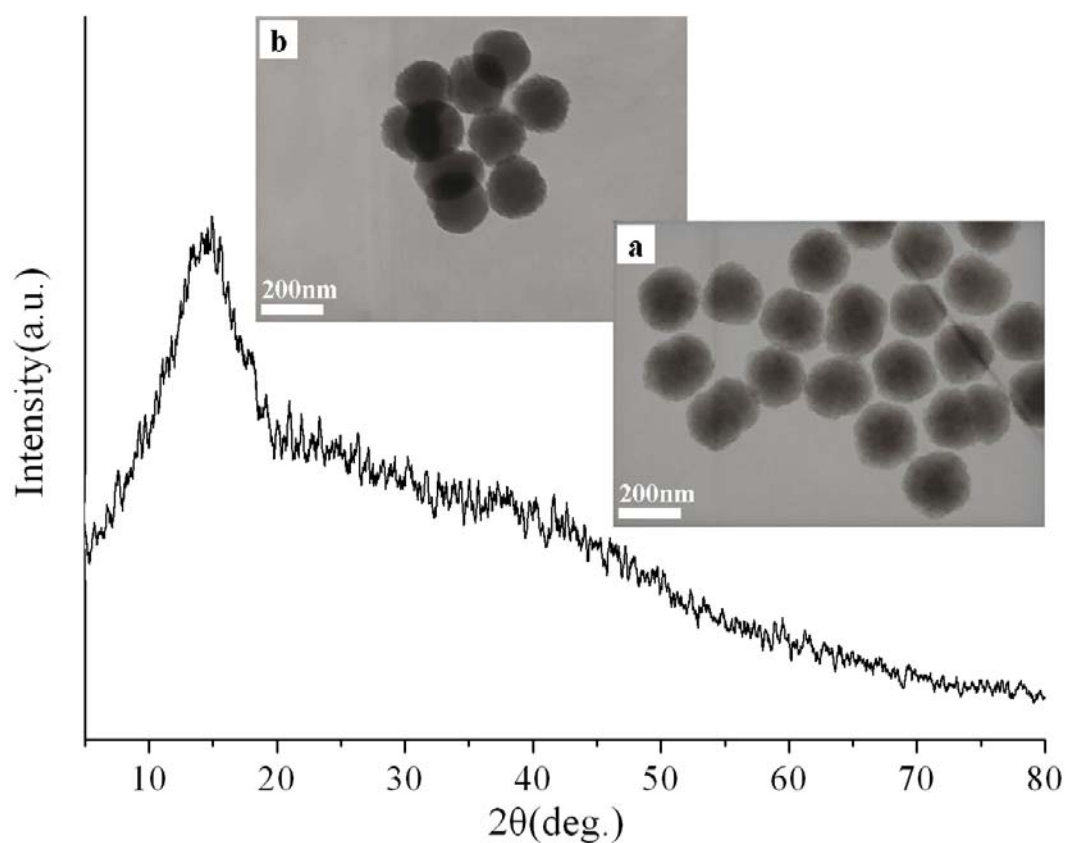

**Fig. S2.** XRD pattern of the sample synthesized at 100 °C and then washed with CS<sub>2</sub>.

Inset a, b – TEM images of the sample before and after washing with CS<sub>2</sub>.
